# Supplementary material for: Unraveling the Antioxidant Activity of 2R,3R-dihydroquercetin
Source: MDPI journal article supplement (doi:10.3390/ijms241814220), 2023-09-18
Supplement: s1 [file s1]

## Supplementary data S1

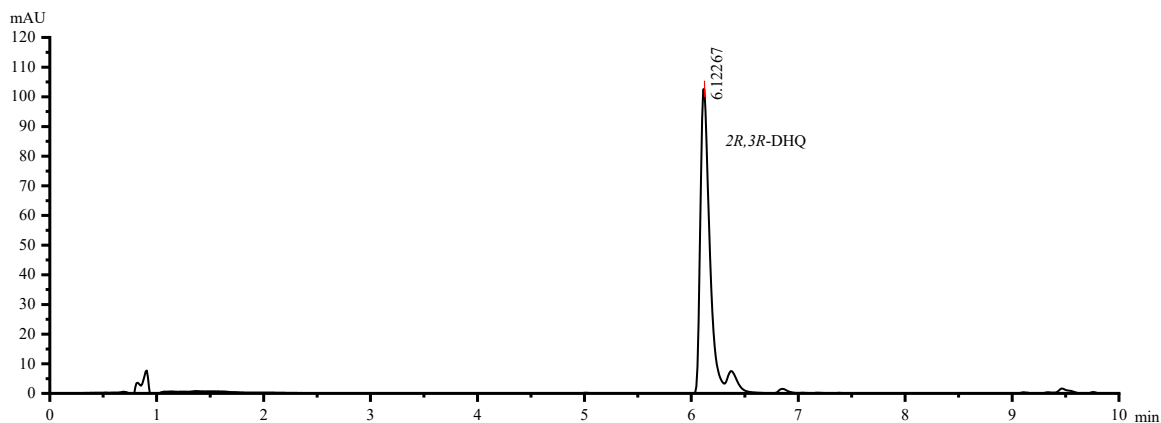

**Figure S1.** The LC-MS-ESI-IT-TOF/MS chromatogram of the 2R,3R-DHQ standard (50  $\mu$ M). The chromatogram presented were based on the detection at 290 nm.

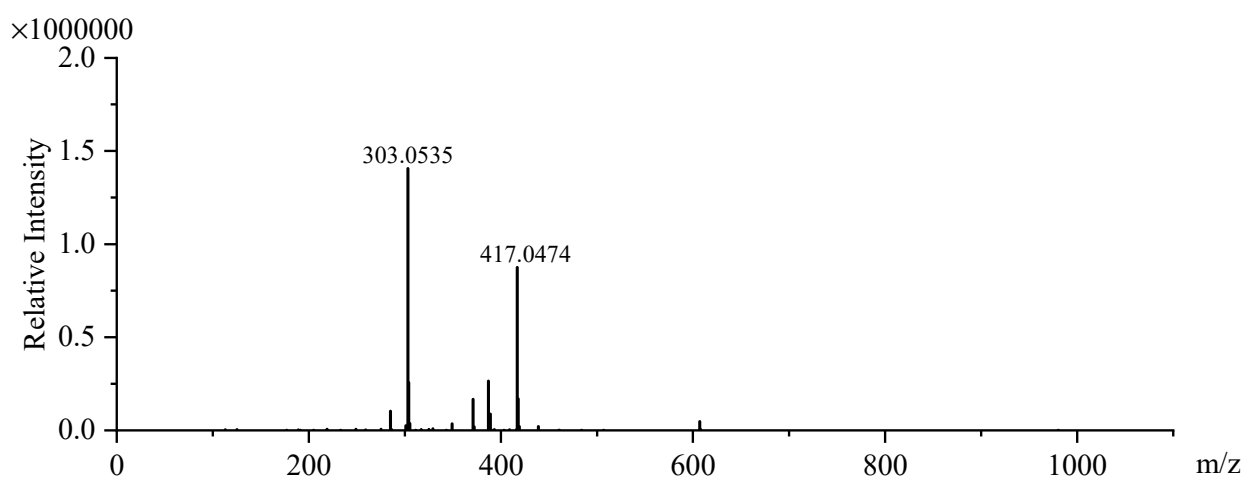

**Figure S2.** ESI-IT-TOF MS spectrum of the small peak observed in the chromatogram of the 2R,3R-DHQ standard that appeared directly after the peak of 2R,3R-DHQ (Figure 1). Based on this spectrum, this peak was attributed to 2R,3S-DHQ.

In the LC-MS-ESI-IT-TOF/MS chromatogram of the 2R,3R-DHQ standard (50  $\mu$ M), there was a small peak alongside 2R,3R-DHQ (Figure 1). The small peak had the same mass as 2R,3R-DHQ, 303.05 m/z (Figure 2), and therefore the peak was attributed to 2R,3S-DHQ that apparently present as a small impurity in the standard. That the 2R,3R-

DHQ and 2*R*,3*S*-DHQ have different retention time in our system is consistent with the results obtained by Li et al. [1] who by using a column comparable to the one as we used, also observed different retention times of the epimers. This corroborates that the 2*R*,3*R*-DHQ can be detected separately from 2*R*,3*S*-DHQ in our analytical system.

1. Li, Y., Su, H., Yin, Z.P., Yuan, E., Zhang Q.F. Metabolism, tissue distribution and excretion of taxifolin in rat. *Biomed. Pharmacother.* 2022, 150, 112959.
